# Supplementary material
Source: PubMed Central journal article supplement (PMC7097058)
Supplement: 41587_2005_BFnbt1106_MOESM2_ESM.pdf [file 41587_2005_BFnbt1106_MOESM2_ESM.pdf]

**a**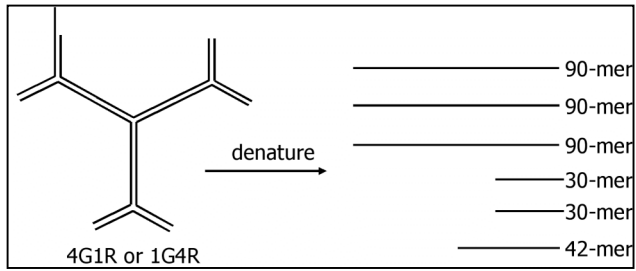**b**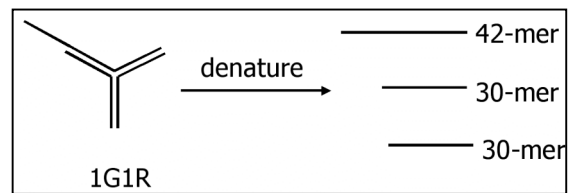**c**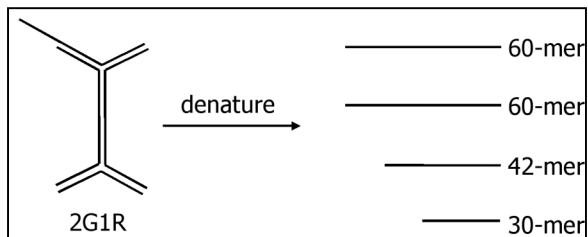**d**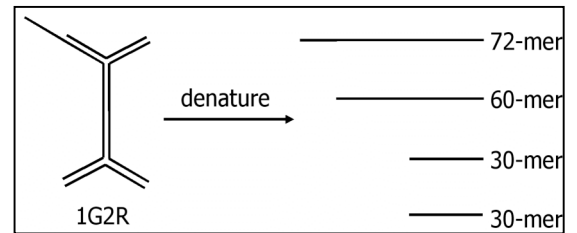

**Supplementary Figure 2.** Schematic drawing of nanobarcode denaturation (without showing fluorescence dyes). **(a)** Barcode 4G1R or 1G4R; **(b)** Barcode 1G1R; **(c)** Barcode 2G1R; **(d)** Barcode 1G2R. Gel electrophoresis of denatured products is shown in **Supplementary Figure 1**.
