# Supplementary material
Source: PubMed Central journal article supplement (PMC7097058)
Supplement: 41587_2005_BFnbt1106_MOESM3_ESM.pdf [file 41587_2005_BFnbt1106_MOESM3_ESM.pdf]

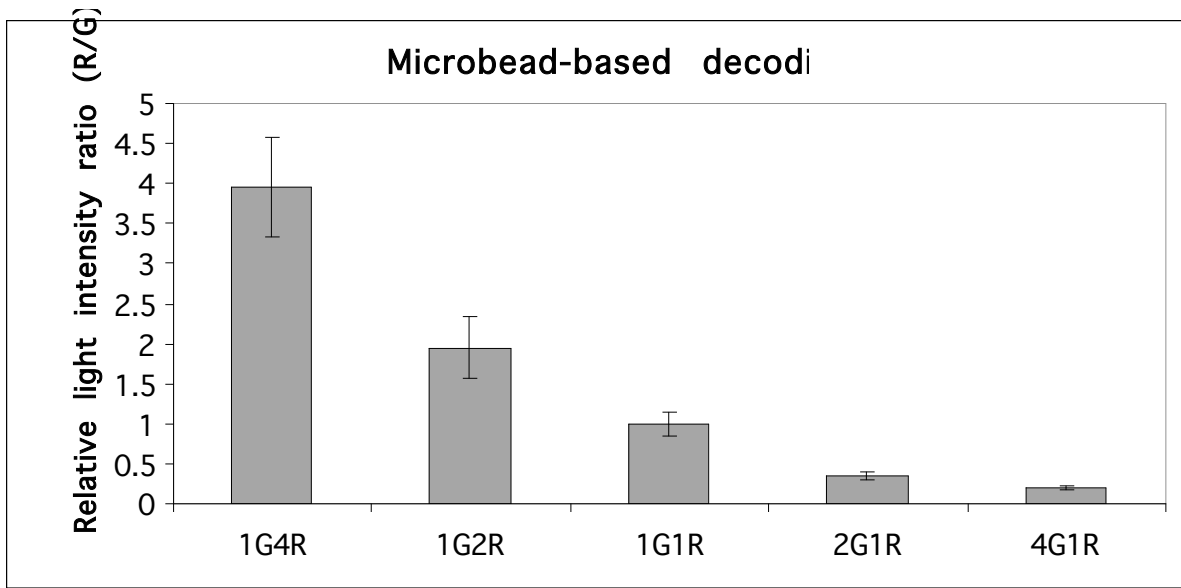

**Supplementary Figure 3.** DNA nanobarcode quantitative decoding based on microbead populations.
