# Supplementary material
Source: PubMed Central journal article supplement (PMC7097058)
Supplement: 41587_2005_BFnbt1106_MOESM4_ESM.pdf [file 41587_2005_BFnbt1106_MOESM4_ESM.pdf]

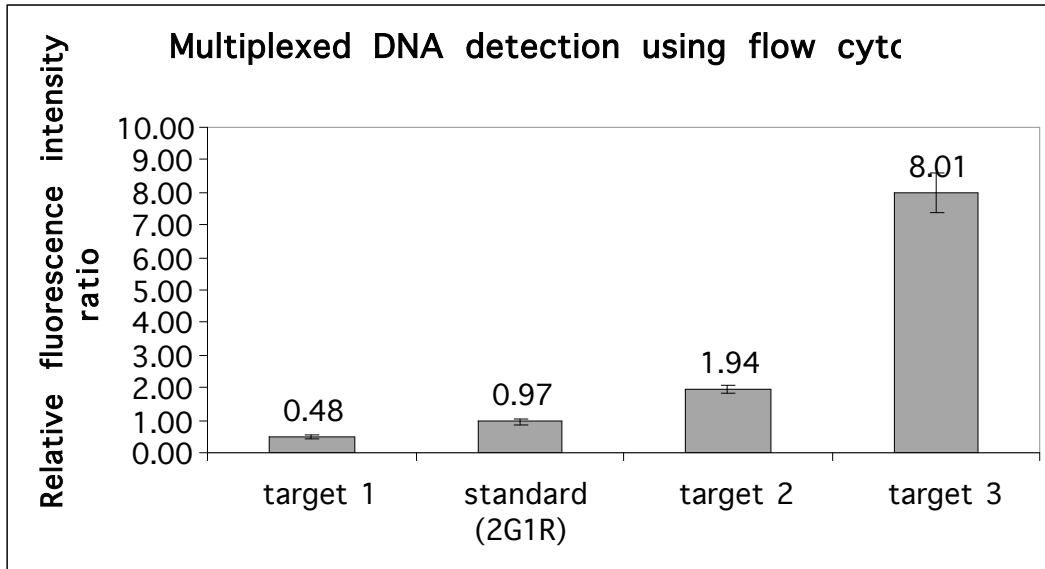

**Supplementary Figure 4.** Statistics multiplexed DNA detection using flow cytometry. Nanobarcode 2G1R was used as a standard and the calculation was based on four batches of experiments, which were performed on different dates. According to the standard, 2G1R, the codes encoding target 1, target 2, target 3 should be  $2G(0.48/0.97 \pm 0.07)R$ ,  $2G(1.94/0.97 \pm 0.25)R$ ,  $2G(8.01/0.97 \pm 1.04)R$  respectively or  $4G(1 \pm 0.14)R$ ,  $1G(1 \pm 0.13)R$ ,  $1G(4 \pm 0.52)R$  respectively.
