# Supplementary material
Source: PubMed Central journal article supplement (PMC7097058)
Supplement: 41587_2005_BFnbt1106_MOESM5_ESM.pdf [file 41587_2005_BFnbt1106_MOESM5_ESM.pdf]

## Supplementary information

### Supplementary Table 1: Building oligonucleotides

| Strand    | Segment 1    | Segment 2                             |
|-----------|--------------|---------------------------------------|
| y1h       | 5'/Phos/CGTT | TGG ATC CGC ATG ACA TTC GCC GTA AG-3' |
| y1d       | 5'/Phos/ATGC |                                       |
| y1Alex488 | 5'/Alex488/  |                                       |
| y2D       | 5'/Phos/GCAT | CTT ACG GCG AAT GAC CGA ATC AGC CT-3' |
| y2e       | 5'/Phos/GCAA |                                       |
| y2Alex488 | 5'/Alex488/  |                                       |
| y2BO630   | 5'/BO630/    |                                       |
| y3D       | 5'/Phos/GCAT | AGG CTG ATT CGG TTC ATG CGG ATC CA-3' |
| y3E       | 5'/Phos/TTGC |                                       |
| y3H       | 5'/Phos/AACG |                                       |
| y3BO630   | 5'/BO630/    |                                       |

Notes: (1) 5'/Phos/ indicates 5' Phosphorylation modification

(2) 5'/Alex488/ indicates 5' Alexa Fluor® 488 NHS Ester modification

(3) 5'/BO630/ indicates 5' Bodipy® 630/650-X NHS Ester modification
