# Supplementary material
Source: PubMed Central journal article supplement (PMC7097058)
Supplement: 41587_2005_BFnbt1106_MOESM6_ESM.pdf [file 41587_2005_BFnbt1106_MOESM6_ESM.pdf]

**Supplementary Table 2: Capture probes, report probes and target DNA**

|                 | Strand                            | Segment 1                                | Segment 2                                |
|-----------------|-----------------------------------|------------------------------------------|------------------------------------------|
| Capture probe   | <u>Capture-Ban</u>                | 5' biotin                                | ATC CTT ATC AAT AT-3'                    |
|                 | <u>Capture-Ebo</u>                |                                          | TGG TGG GTT ATA AT-3'                    |
|                 | <u>Capture-Sco</u>                |                                          | G CTG TGA ACC AAG-3'                     |
|                 | <u>Capture-SMPo</u>               |                                          | CGT CTC TAC CTG AT-3'                    |
|                 | <u>Capture-control</u>            |                                          | AAT TAA CAA TAA CCT-3'                   |
| y1-report probe | y1-report-Ban                     | 5'T TAA CAA TAA TCC                      | TGG ATC CGC ATG ACA<br>TTC GCC GTA AG-3' |
|                 | y1-report-Ebo                     | 5'A ATC ACT GAC ATG                      |                                          |
|                 | y1-report-Sco                     | 5'ACG CAG TAT TAT                        |                                          |
|                 | y1-report -SMPo                   | 5'T ACT ATT GCA TCT                      |                                          |
|                 | y1-report-control                 | GGA TTA TTG TTA ATT                      |                                          |
| Target DNA      | Target 1 ( <i>B. anthracis</i> )  | 5'GGA TTA TTG TTA AAT ATT GAT AAG GAT-3' |                                          |
|                 | Target 2 ( <i>F. tularensis</i> ) | 5'CAT GTC AGT GAT TAT TAT AAC CCA CCA-3' |                                          |
|                 | Target 3 (Ebola virus)            | 5'ATA ATA CTG CGT CTT GGT TCA CAG C-3'   |                                          |
|                 | Target 4 (SARS Coronavirus)       | 5'AGA TGC AAT AGT AAT CAG GTA GAG ACG    |                                          |
