# Supplementary material
Source: PubMed Central journal article supplement (PMC7097058)
Supplement: 41587_2005_BFnbt1106_MOESM7_ESM.pdf [file 41587_2005_BFnbt1106_MOESM7_ESM.pdf]

**Supplementary Table 3: Y-DNA building blocks**

| Oligonucleotide                | Hybridization | Y-DNA      |
|--------------------------------|---------------|------------|
| y1h + y2e + y3D                |               | Y-core     |
| y1-probe + y1Alex488 + y3BO630 |               | YGR-probe1 |
| y1-probe + y2Alex488 + y3D     |               | YG-probe2  |
| y1-probe + y2Alex488 + y3H     |               | YG-probe3  |
| y1Alex488 + y2Alex488 + y3E    |               | YGG        |
| y1d + y2Alex488 + y3BO630      |               | YGR1       |
| y1Alex488 + y2BO630 + y3E      |               | YGR2       |
| y1d + y2BO630 + y3BO630        |               | YRR        |
| y1-probe + y2BO630 + y3H       |               | YR-probe4  |
| y1-probe + y2D + y3BO630       |               | YR-probe5  |
