# Supplementary material
Source: PubMed Central journal article supplement (PMC7097058)
Supplement: 41587_2005_BFnbt1106_MOESM8_ESM.pdf [file 41587_2005_BFnbt1106_MOESM8_ESM.pdf]

**Supplementary Table 4: DNA nanobarcodes**

| Y-DNA building blocks           | Ligation | DL-DNA based nanobarcodes |
|---------------------------------|----------|---------------------------|
| Y-core + YG-probe3 + YGG + YGR1 |          | 4G1R                      |
| YG-probe2 + YGR1                |          | 2G1R                      |
| YGR-probe1                      |          | 1G1R                      |
| YR-probe5 + YGR1                |          | 1G2R                      |
| Y-core + YR-probe4 + YRR + YGR2 |          | 1G4R                      |
