# Supplementary material
Source: PubMed Central journal article supplement (PMC7097058)
Supplement: 41587_2005_BFnbt1106_MOESM9_ESM.pdf [file 41587_2005_BFnbt1106_MOESM9_ESM.pdf]

**Supplementary Table 5: Code library**

| Barcode | Coded target                                                                                                       |
|---------|--------------------------------------------------------------------------------------------------------------------|
| 4G1R    | Anthrax lethal factor of <i>Bacillus anthracis</i> <sup>17</sup><br>(GGA TTA TTG TTA AAT ATT GAT AAG GAT)          |
| 2G1R    | Lipoprotein gene of <i>Francisella tularensis</i> (435-463) <sup>18</sup><br>(GCT GTA TCA TCA TTT AAT AAA CTG CTG) |
| 1G1R    | L gene of Ebola virus(13601-13631) <sup>19</sup><br>(CAT GTC AGT GAT TAT TAT AAC CCA CCA)                          |
| 1G2R    | Control, where the capture probe and the report were complementary to each other for hybridization control         |
| 1G4R    | N gene of SARS Coronavirus (28262-28286) <sup>20</sup><br>(ATA ATA CTG CGT CTT GGT TCA CAG C)                      |
